# Supplementary material
Source: publisher site journal article supplement (https://www.dovepress.com/article/453964)
Supplement: Supplementary file 1 [file get_supplementary_file.php]

**Appendix 1-**

The MEU recruited four faculty members from different departments at AUSOM.

**The eligibility criteria to be included as a member of the medical education unit:**

- Ph.D. in medical education/education or
- Masters/diploma/certificate courses in medical education/health professions education or
- Fellowship by the International Association of Medical Science Educators (IAMSE) or
- Fellowship by the Higher Education Academy/ Advance Higher Education, UK or
- Fellowship/Associate Fellowship by the International Association of Medical Education in Europe (AMEE) or
- Being a leading author/corresponding author/ principal author for a medical education article in a reputed medical education journal.

**The role of the medical education unit is.**

- To demonstrate ability to assess detriment gaps in the education model, preparation of goals and objectives (all types and all levels), instructional strategies- focusing on integrated curriculum models, active learning principles, simulation, small group vs large group roles, and program evaluation.
- To acquire the knowledge needed to identify fundamental goals and support learning objectives using Blooms Taxonomy.
- To demonstrate the knowledge needed to apply adult learning principles to the overall SOM curriculum model.
- To demonstrate the knowledge needed to participate in course/session planning, curriculum design, and assessment (formative and summative) methods.
- To demonstrate the skills needed for interdisciplinary teamwork with staff, peers, and school leadership to achieve school of medicine goals.
- To demonstrate the knowledge needed to design research projects and mentor students on projects, including quantitative, qualitative, and mixed methods.
- To demonstrate the knowledge needed to apply different research designs, research paradigms, and sampling methods used in medical education research.
- To demonstrate the knowledge needed to analyze quantitative and qualitative data.
- To prepare academic presentations, posters and papers for peer reviewed professional meetings and journals.
- To demonstrate ability to acquire evidence-based medical education resources to apply to teaching and research activities.
- To demonstrate the reflective practice considering reflection in action, on action and for action as guides to self-directed learning and professional development.

**Course modules of medical education elective**

**Module 1 – Assessments:**

• Foundation and principles of assessment

• E-assessments

• Blueprinting

• Self-assessment

• Objective structured clinical assessment

• Clinical and oral examinations

• Workplace-based assessments

• Standard Setting

**Module 2 – Educational Research Methodology:**

• Literature Review

• Research designs

• Quantitative methods

• Qualitative methods

• Quantitative data analysis

• Qualitative data analysis

• Research governance

**Module 3 – Curriculum Development**

• Curriculum models and theories

• Integrated curricula

• Curriculum development

• Managing the curriculum

• Contextual curriculum

• Curriculum evaluation

• Curriculum – A critique

**Module 4 – Learning**

• Learning theories

• Learning clinical and communication skills

• Learning basic sciences

• Learning in the community

• Supporting learners

• Learning clinical problem solving

• Simulation

• Continuing professional development

**Module 5 – Accreditation and Regulation**

• Regulation and Accreditation of Health Professions Education

• Standards of Medical Education

• Conducting a Self-review

• Self-review in Low-resource Circumstances

• Implementing Improvements after Self-review

• Managing and Leading Change

• Regulation and Accreditation in a Global Context: International Accreditation.

**This elective course consists of**

- All the work is done through online modules. All students are required to complete these modules individually.
- Most of the work is done through reading and writing assignments.
- The overall grade is based on the average grade of all assignments.
